# Supplementary material for: Infant Feeding and Ethnic Differences in Body Mass Index during Childhood: A Prospective Study
Source: MDPI journal article supplement (doi:10.3390/nu13072291), 2021-07-01
Supplement: s1 [file s1]

## Supplementary material

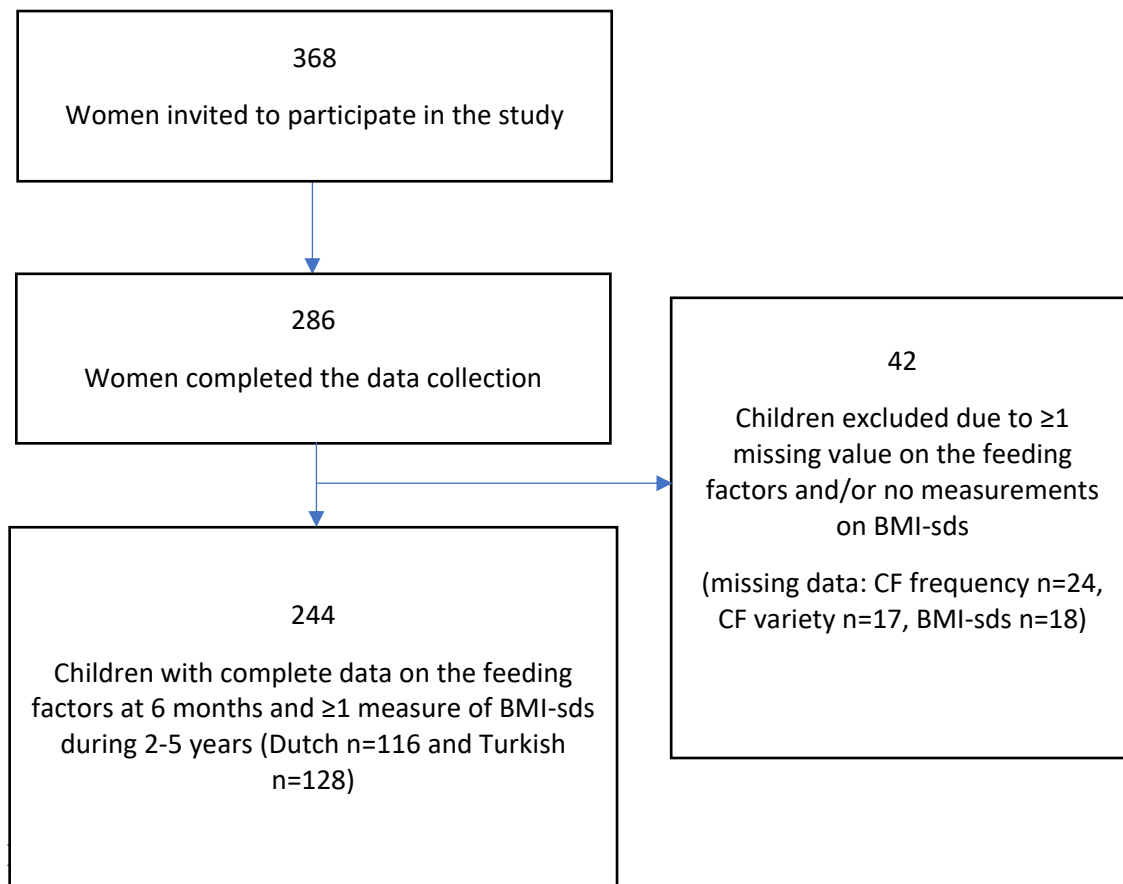

**Figure S1.** Flowchart of the study participants.

**Table S1.** Mean differences in estimated BMI-sds at ages 2, 3 and 5 by ethnicity and feeding factors (n=229), derived from the LMR model 5.

|                                               | 2 years             | Model 5 <sup>a</sup><br>3 years<br>Mean difference (95% CI) | 5 years             |
|-----------------------------------------------|---------------------|-------------------------------------------------------------|---------------------|
| Ethnicity<br>(Turkish vs. Dutch)              | -0.13 (-0.42, 0.17) | 0.03 (-0.26, 0.31)                                          | 0.33 (0.02, 0.64)*  |
| Full BF duration<br>(<6 months vs. ≥6 months) | -0.11 (-0.40, 0.17) | -0.11 (-0.40, 0.17)                                         | -0.11 (-0.40, 0.17) |
| Milk feeding frequency                        | 0.03 (-0.03, 0.10)  | 0.03 (-0.03, 0.10)                                          | 0.03 (-0.03, 0.10)  |
| Timing of CF<br>(<6 months vs. ≥6 months)     | -0.05 (-0.29, 0.19) | -0.05 (-0.29, 0.19)                                         | -0.05 (-0.29, 0.19) |
| CF variety score<br>(2 vs. 1)                 | 0.11 (-0.16, 0.38)  | 0.11 (-0.15, 0.37)                                          | 0.12 (-0.17, 0.41)  |
| (≥3 vs. 1)                                    | 0.37 (0.01, 0.73)*  | 0.41 (0.07, 0.76)*                                          | 0.49 (0.12, 0.87)*  |
| CF frequency                                  | -0.05 (-0.16, 0.06) | -0.05 (-0.16, 0.06)                                         | -0.05 (-0.16, 0.06) |

BF = breastfeeding; CF = complementary feeding. Data are least-square means and 95% CI. Linear mixed models were used to model mean differences in estimated BMI-sds at age 2, 3 and 5 years by ethnicity and the feeding patterns. \* P<0.05. <sup>a</sup> Adjusted for all infant feeding factors and the covariates (maternal: age, smoking, parity; child: sex, gestational age, birth weight-sds).

**Table S2.** Mean differences in estimated BMI-sds at ages 2, 3 and 5 years by ethnicity and feeding factors (n=156), derived from the LMR (model 6).

|                                                              | Model 6 <sup>a</sup> |                                     |                     |
|--------------------------------------------------------------|----------------------|-------------------------------------|---------------------|
|                                                              | 2 years              | 3 years<br>Mean difference (95% CI) | 5 years             |
| Ethnicity<br>(Turkish vs. Dutch)                             | -0.24 (-0.60, 0.12)  | 0.08 (-0.26, 0.43)                  | 0.23 (-0.14, 0.60)  |
| Full breastfeeding duration<br>(<6 months vs. ≥6 months)     | -0.22 (-0.58, 0.14)  | -0.22 (-0.58, 0.14)                 | -0.22 (-0.58, 0.14) |
| Milk feeding frequency                                       | 0.02 (-0.06, 0.10)   | 0.02 (-0.06, 0.10)                  | 0.02 (-0.06, 0.10)  |
| Timing of complementary feeding<br>(<6 months vs. ≥6 months) | -0.05 (-0.33, 0.22)  | -0.05 (-0.33, 0.22)                 | -0.05 (-0.33, 0.22) |
| Complementary feeding variety score<br>(2 vs. 1)             | 0.05 (-0.26, 0.37)   | 0.08 (-0.22, 0.38)                  | 0.14 (-0.19, 0.48)  |
| (≥3 vs. 1)                                                   | 0.35 (-0.11, 0.81)   | 0.39 (-0.05, 0.83)                  | 0.48 (0.01, 0.96)*  |
| CF frequency                                                 | -0.02 (-0.16, 0.12)  | -0.02 (-0.16, 0.12)                 | -0.02 (-0.16, 0.12) |

BF = breastfeeding; CF = complementary feeding. Data are least-square means and 95% CI. Linear mixed models were used to model mean differences in estimated BMI-sds at age 2, 3 and 5 years by ethnicity and the feeding patterns. \* P<0.05. <sup>a</sup> Model includes model 5 (all infant feeding factors and maternal: age, smoking, parity; child: gestational age, birth weight) and maternal BMI.
